# Supplementary material for: Probing charge transfer in a novel class of luminescent perovskite-based heterostructures composed of quantum dots bound to RE-activated CaTiO3 phosphors
Source: Royal Society of Chemistry journal article supplement (doi:10.1039/c5nr06697b), 2016-01-01
Supplement: c5nr06697b1.pdf [file c5nr06697b1.pdf]

Supporting Information for

**‘Probing Charge Transfer in a Novel Class of Luminescent  
Perovskite-Based Heterostructures Composed  
of Quantum Dots Bound to RE-Activated CaTiO<sub>3</sub> Phosphors’**

Crystal S. Lewis<sup>1</sup>, Haiqing Liu<sup>1</sup>, Jinkyu Han<sup>2</sup>, Lei Wang<sup>1</sup>,  
Shiyu Yue<sup>1</sup>, Nicholas A. Brennan<sup>1</sup>, and Stanislaus S. Wong<sup>1,2\*</sup>

<sup>1</sup>Department of Chemistry, State University of New York at Stony Brook,

Stony Brook, NY 11794-3400

<sup>2</sup>Condensed Matter of Physics and Materials Sciences Department,  
Brookhaven National Laboratory, Building 480; Upton, NY 11973

\*To whom correspondence should be addressed.

Email: [Stanislaus.wong@stonybrook.edu](mailto:Stanislaus.wong@stonybrook.edu); [sswong@bnl.gov](mailto:sswong@bnl.gov)

Phone: 631-632-1703; 631-344-3178



| #                                            | Precursors<br>(Ratio is 1: 1 unless<br>otherwise noted) | Titanium<br>Precursor     | Temp<br>(°C) | Surfactant<br>(mL) | Time<br>(hr) | Cooling<br>Rate<br>(°C/min) | Product (composition, morphology, size)                                              |
|----------------------------------------------|---------------------------------------------------------|---------------------------|--------------|--------------------|--------------|-----------------------------|--------------------------------------------------------------------------------------|
| <b>Molten Salt Method</b>                    |                                                         |                           |              |                    |              |                             |                                                                                      |
| <i>(Titanium precursor): Pr doped sample</i> |                                                         |                           |              |                    |              |                             |                                                                                      |
| <b>A</b>                                     | Calcium Oxalate and TiO <sub>2</sub>                    | P25 TiO <sub>2</sub>      | 820          | No surfactant      | 3.5          | Natural cooling             |                                                                                      |
| <b>B</b>                                     | Calcium Oxalate and TiO <sub>2</sub>                    | P25 TiO <sub>2</sub>      | 820          | No surfactant      | 3.5          | <b>Quenched</b>             | Avg. Diam.:<br>Increased cubic morphology                                            |
| <b>C</b>                                     | Calcium Oxalate and TiO <sub>2</sub>                    | P25 TiO <sub>2</sub>      | 820          | NP-9<br>(1.75 mL)  | 3.5          | Natural cooling             | Avg. Diameters: 54 ± 13 nm<br>50% cubes vs. 50% spheres – Pure CaTiO <sub>3</sub>    |
| <b>D</b>                                     | Calcium Oxalate and TiO <sub>2</sub>                    | P25 TiO <sub>2</sub>      | 820          | NP-9<br>(2.33 mL)  | 3.5          | Natural cooling             | Pure CaTiO <sub>3</sub>                                                              |
| <b>E</b>                                     | Calcium Oxalate and TiO <sub>2</sub>                    | P25 TiO <sub>2</sub>      | 820          | Triton X-100       | 3.5          | Natural cooling             | Pure CaTiO <sub>3</sub>                                                              |
| <b>F</b>                                     | Calcium Oxalate and Bulk TiO <sub>2</sub>               | Bulk TiO <sub>2</sub>     | 820          | Triton X-100       | 3.5          | Natural cooling             | Average Diameters: 210 ± 22 nm<br>100% Roughened particles – Pure CaTiO <sub>3</sub> |
| <b>G</b>                                     | Calcium oxalate and TiO <sub>2</sub>                    | P25 TiO <sub>2</sub>      | 820          | Triton X-100       | 3.5          | Natural cooling             | Pure CaTiO <sub>3</sub>                                                              |
| <b>H</b>                                     | Calcium Oxalate and TiO <sub>2</sub>                    | 5 nm TiO <sub>2</sub> NPs | 820          | NP-9               | 3.5          | Natural cooling             | Avg. Diameters: 56 ± 33 nm<br>30% cubes vs. 70% particles – Pure CaTiO <sub>3</sub>  |
| <i>Eu doped sample</i>                       |                                                         |                           |              |                    |              |                             |                                                                                      |
| <b>1</b>                                     | Calcium Oxalate and 2% Europium Nitrate                 | Bulk TiO <sub>2</sub>     | 820          | Triton X-100       | 3.5          | Natural cooling             | Average Diameters: 210 ± 32 nm<br>100% Roughened particles – Pure CaTiO <sub>3</sub> |
| <b>2</b>                                     | Calcium Oxalate and 4% Europium Nitrate                 | Bulk TiO <sub>2</sub>     | 820          | Triton X-100       | 3.5          | Natural cooling             | Average Diameters: 220 ± 26 nm<br>100% Roughened particles – Pure CaTiO <sub>3</sub> |

| <b>3</b>                   | Calcium Oxalate and 6% Europium Nitrate                  | Bulk TiO <sub>2</sub> | 820              | Triton X-100         | 3.5         | Natural cooling | Average Diameters: 290 ± 35 nm<br>100% Roughened particles – Pure CaTiO <sub>3</sub>                                                     |
|----------------------------|----------------------------------------------------------|-----------------------|------------------|----------------------|-------------|-----------------|------------------------------------------------------------------------------------------------------------------------------------------|
| <b>Hydrothermal Method</b> |                                                          |                       |                  |                      |             |                 |                                                                                                                                          |
| <b>#</b>                   | <b>Precursor Ratios (1M NaOH unless otherwise noted)</b> | <b>Ti precursor</b>   | <b>Temp. (C)</b> | <b>Surfactant</b>    | <b>Time</b> | <b>Cooling</b>  | <b>Product (composition, morphology, size)</b>                                                                                           |
| <b>F</b>                   | 0.25 Ca(OH) <sub>2</sub> Stock Solution                  | Ti foil               | 130              | <b>No surfactant</b> | <b>4</b>    | Natural cooling | Avg. Diameters: 278 ± 87 nm<br>Large aggregates of CaTiO <sub>3</sub> -- with TiO <sub>2</sub> and CaO <sub>4</sub> impurities           |
| <b>G</b>                   | 0.5 M CaCl <sub>2</sub> – 30 mL for 4 hours              | Ti foil               | 180              | <b>No surfactant</b> | 4           | Natural cooling | Avg. Diameters: 178 ± 87 nm<br>Cubes - No CaTiO <sub>3</sub> -- with TiO <sub>2</sub> and CaO <sub>4</sub> impurities – Irreproducible!! |
| <b>H</b>                   | 0.5M CaCl <sub>2</sub> – 10 mL                           |                       | 180              | <b>No surfactant</b> | 4           | Natural cooling | Avg. Diam.: 500 ± 154 nm<br>Microspheres with CaO <sub>4</sub> impurity-- without HCl wash                                               |
| <b>I</b>                   | 0.25 CaCl <sub>2</sub> – 10 mL                           |                       | 180              | <b>No surfactant</b> | 4           | Natural cooling | Avg. Diam.: 380 ± 140 nm<br>Microspheres with reduced intensity of CaO <sub>4</sub> impurities-- <b>without HCl wash</b>                 |
| <b>J</b>                   | 0.25 CaCl <sub>2</sub> – 10 mL                           |                       | 180              | <b>No surfactant</b> | 10          | Natural cooling | Avg. Diam.: 500 ± 45 nm<br>Microspheres with reduced intensity of CaO <sub>4</sub> impurities-- <b>without HCl wash</b>                  |

**Table S1.** Detailed reaction parameters and product descriptions for all reactions conducted using both the molten salt and hydrothermal methods for preparing Pr doped-CaTiO<sub>3</sub> micron-scale spheres.

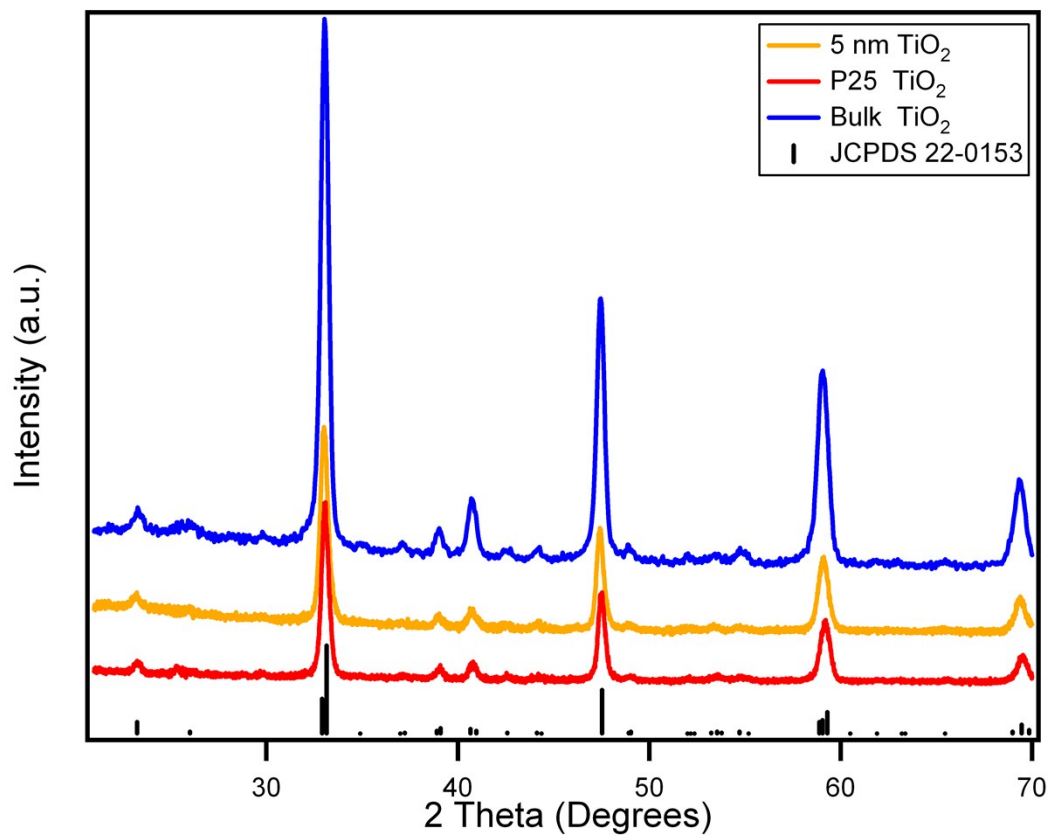

**Figure S1.** XRD results for samples, prepared using the molten salt method with various titanium precursors.

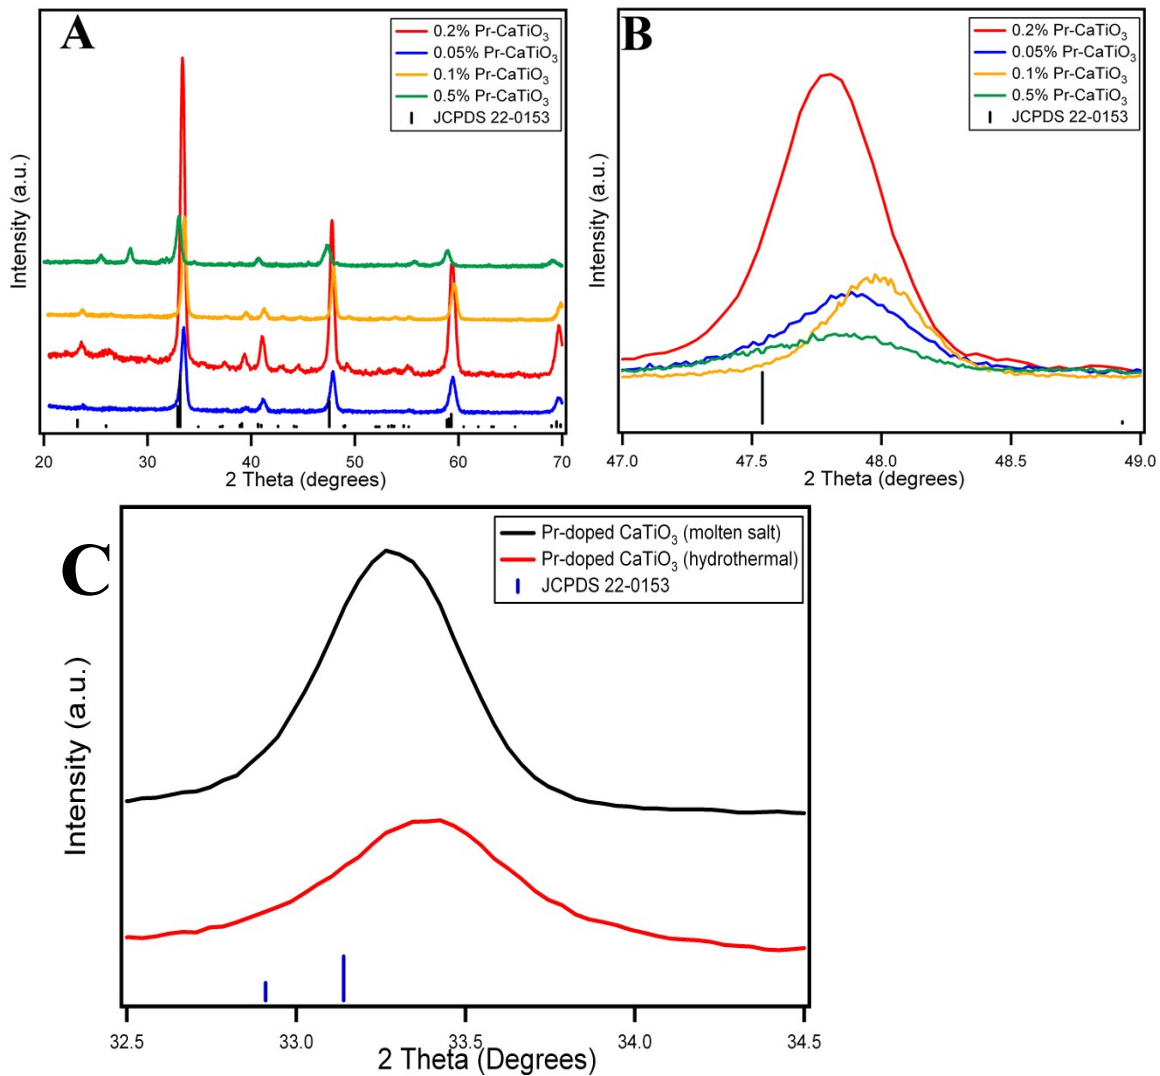

**Figure S2.** X-Ray Diffraction patterns of (A) 0.2%, 0.05%, 0.1%, and 0.5% Pr-doped CaTiO<sub>3</sub>; associated peak shifts (B) for a signal centered at a  $2\theta$  value of  $\sim 47$  degrees; as well as peaks shifts (C) for the molten salt-prepared (black) and hydrothermally-generated (red) 0.2% Pr-doped CaTiO<sub>3</sub> samples, centered at a  $2\theta$  value of  $\sim 33$  degrees.

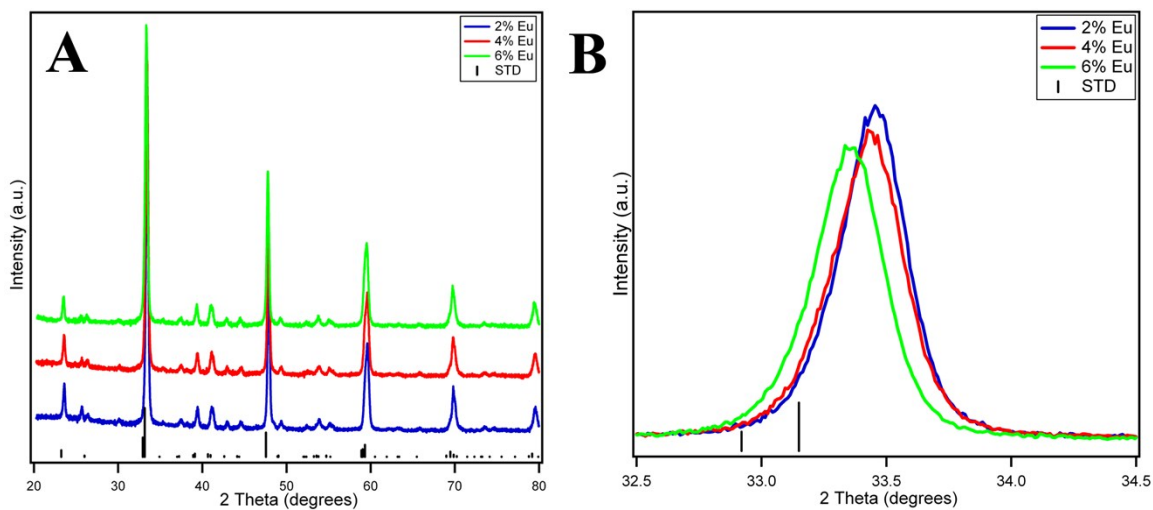

**Figure S3.** X-Ray Diffraction patterns of (A) 0.2%, 0.05%, 0.1%, and 0.5% Eu-doped CaTiO<sub>3</sub> and associated peak shifts for a signal centered at a 2θ of ~33 degrees.

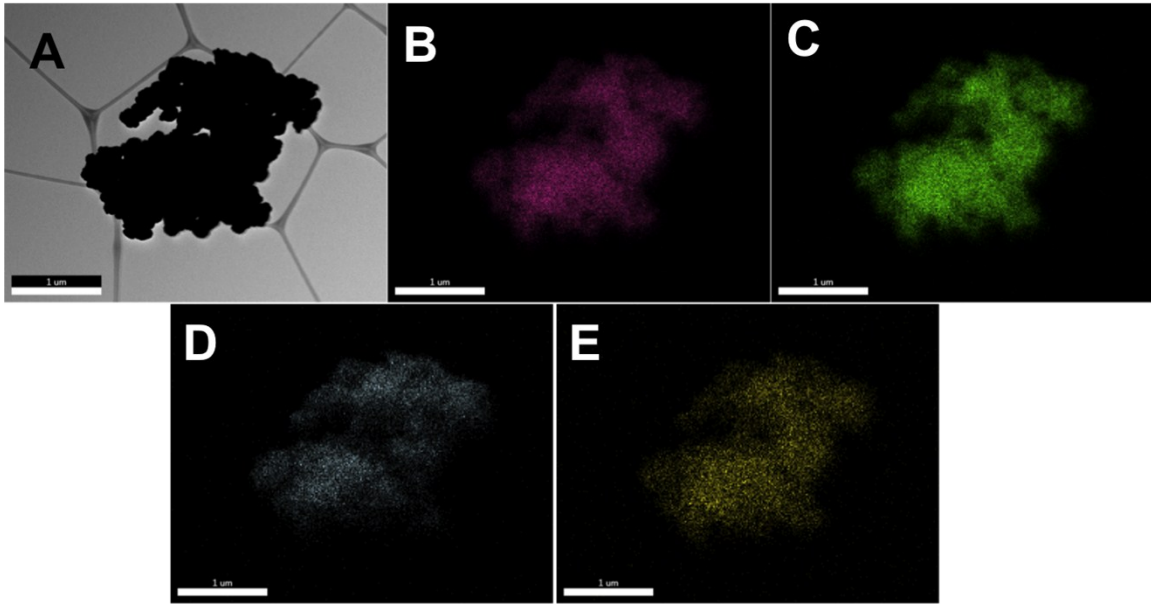

**Figure S4.** (A) Dark-field STEM image of CdSe QDs anchored onto CaTiO<sub>3</sub>: Pr heterostructures. Elemental mapping of the same region, as measured by energy dispersive X-ray spectroscopy, highlighting the spatial elemental distribution of (B) Ca, (C) Ti, (D) O, and (E) Pr, respectively. Scale bar is 1 μm for each image.



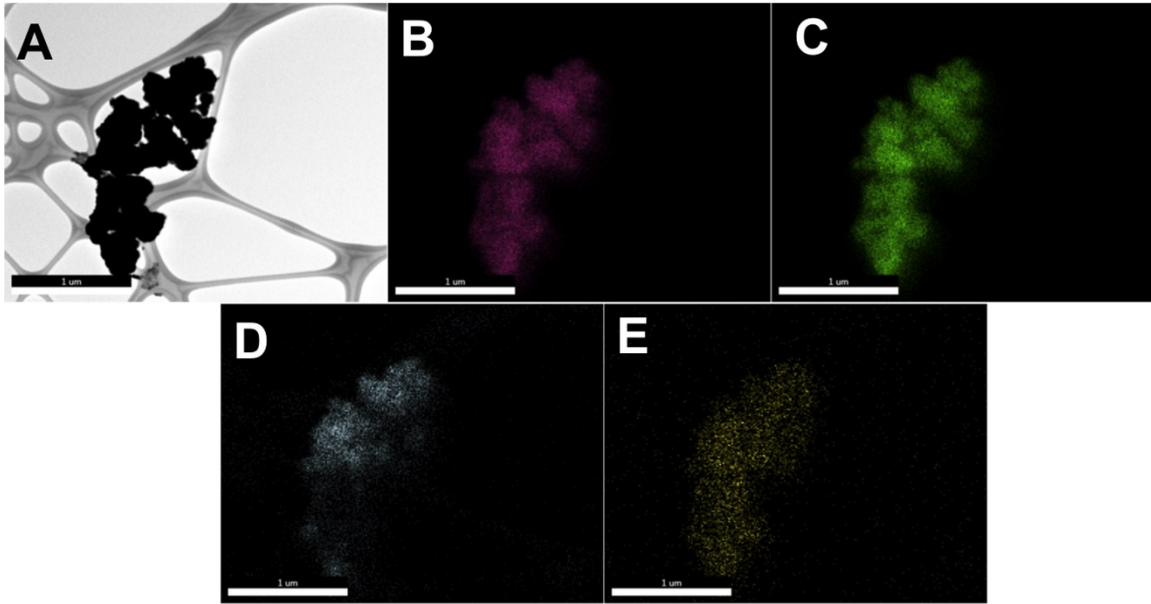

**Figure S5.** (A) Dark-field STEM image of CdSe QDs anchored onto CaTiO<sub>3</sub>: Eu heterostructures. Elemental mapping of the same region, as measured by energy dispersive X-ray spectroscopy, highlighting the spatial elemental distribution of (B) Ca, (C) Ti, (D) O, and (E) Eu, respectively. Scale bar is 1 μm for each image.

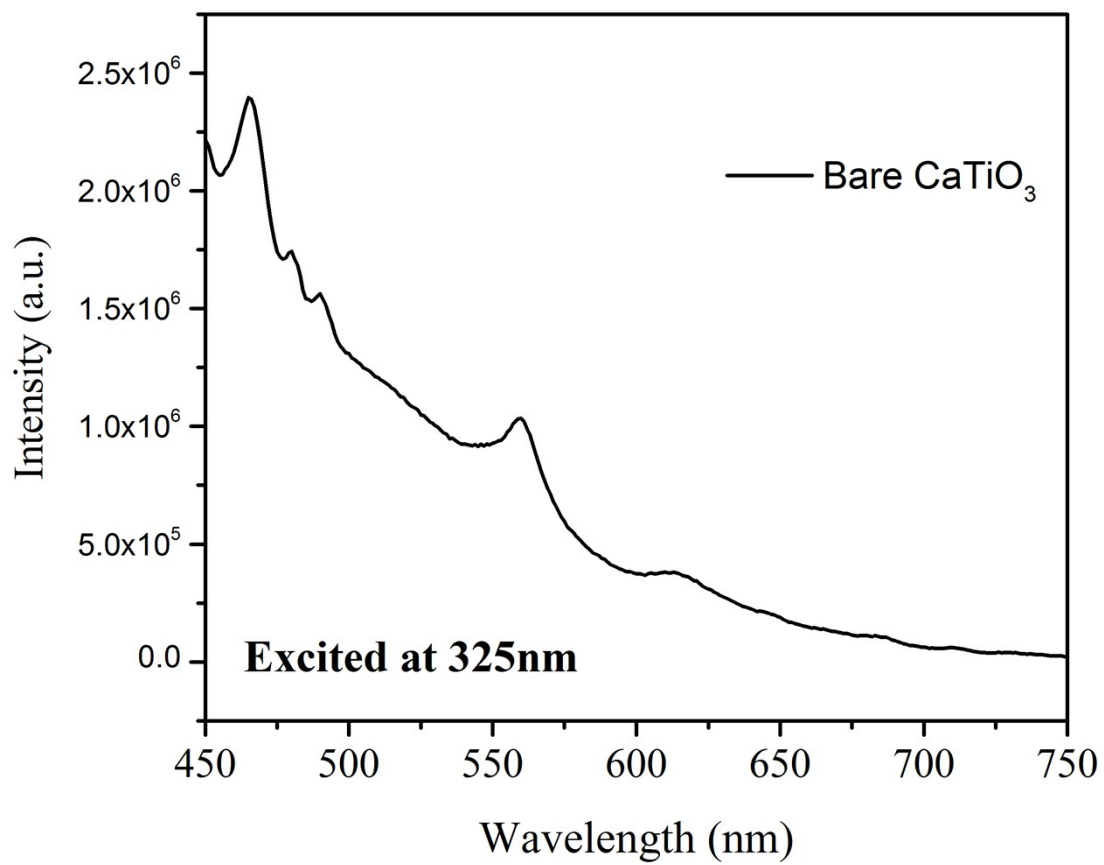

**Figure S6.** Photoluminescence emission profile of bare CaTiO<sub>3</sub>.

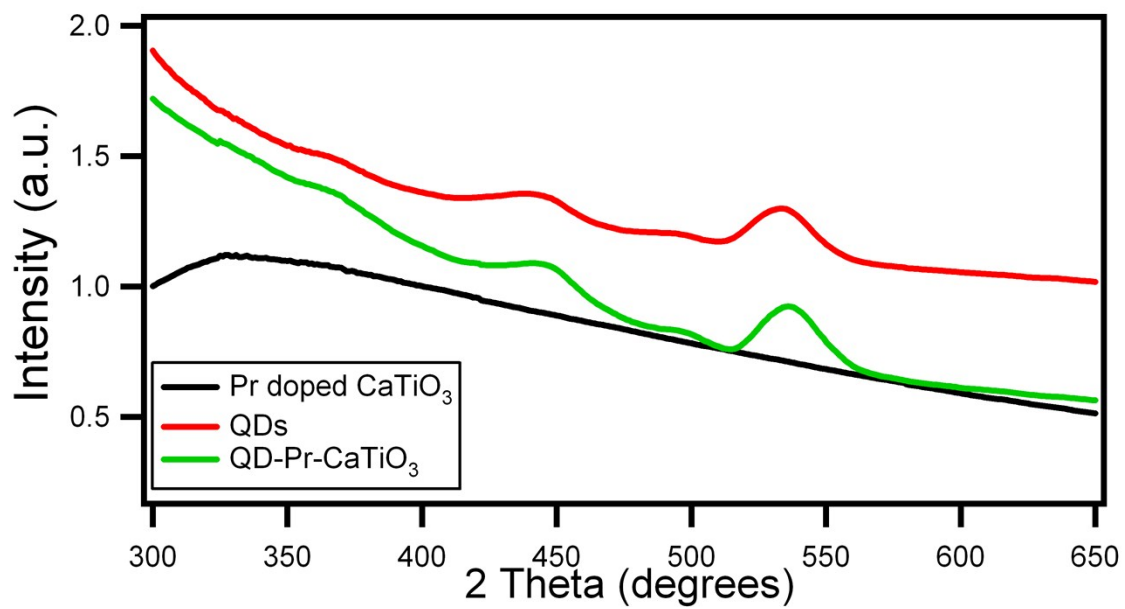

**Figure S7.** UV-visible spectra of Pr doped  $\text{CaTiO}_3$ , bare CdSe QDs, and Pr-doped  $\text{CaTiO}_3$  structures, decorated with CdSe QDs.

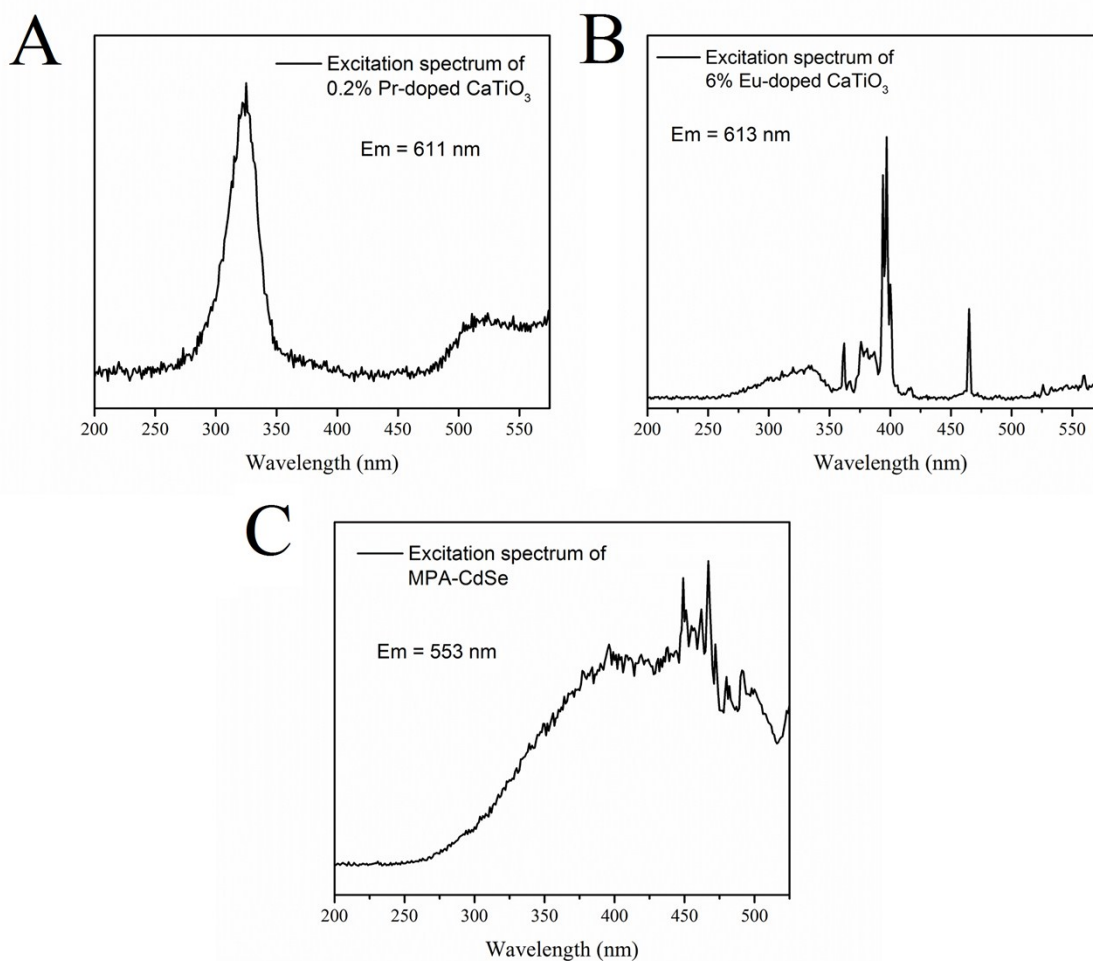

**Figure S8.** Excitation spectra of Pr-doped  $\text{CaTiO}_3$ , Eu-doped  $\text{CaTiO}_3$ , and MPA-capped CdSe QDs. Emission data were acquired at their respective emission peak positions.

**Table S2.** BET surface area analysis of as-prepared samples of lanthanide ion-doped CaTiO<sub>3</sub>

| <b>Name</b>                                           | <b>Surface Area (m<sup>2</sup>/g)</b> |
|-------------------------------------------------------|---------------------------------------|
| Pr-CaTiO <sub>3</sub> : MSS (molten salt syn.) method | 8.79                                  |
| Pr-CaTiO <sub>3</sub> : Hydrothermal method           | 51.9                                  |
| Eu-CaTiO <sub>3</sub> : MSS (molten salt syn.) method | 9.56                                  |
